# Supplementary material
Source: Springer Nature journal article supplement (https://www.springermedizin.de/resource/supplementary/12958_2014_1247_MOESM6_ESM.pdf/9567140)

**a**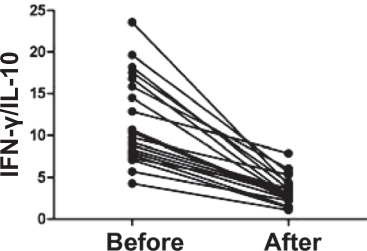**b**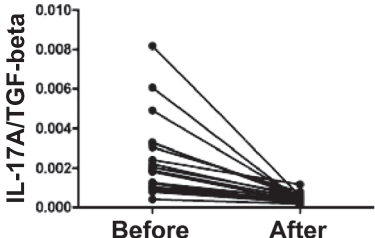

Supplement: MOESM6 [file 9567140]
